# Supplementary material
Source: PubMed Central journal article supplement (PMC4695294)
Supplement: NIHMS722256-supplement-6.pdf [file NIHMS722256-supplement-6.pdf]

**Table S5: Performance of GFR estimating equations including vs. not including age, sex and race in the development dataset**

| Equation/Covariates  | Group            | N      | Bias (95% CI)             | RMSE (95% CI)               |                             |
|----------------------|------------------|--------|---------------------------|-----------------------------|-----------------------------|
| BTP equation, No ASR | All              | 2380   | 0.61 (0.17, 1.06)         | 0.289 (0.279, 0.299)        |                             |
|                      | Female           | 953    | -1.90 (-2.86, -0.89)      | <b>0.301 (0.285, 0.319)</b> |                             |
|                      | Male             | 1427   | <b>2.39 (1.61, 3.10)</b>  | 0.281 (0.269, 0.294)        |                             |
|                      | Black            | 1308   | 0.58 (0.04, 1.41)         | 0.297 (0.284, 0.311)        |                             |
|                      | Non-black        | 1072   | 0.62 (0.02, 1.29)         | 0.279 (0.265, 0.294)        |                             |
|                      | Age<40           | 307    | <b>2.82 (1.03, 4.98)</b>  | 0.287 (0.265, 0.309)        |                             |
|                      | Age 40-65        | 1603   | 0.53 (0.11, 1.09)         | 0.294 (0.282, 0.307)        |                             |
|                      | Age>65           | 470    | -0.42 (-1.80, 0.78)       | <b>0.272 (0.250, 0.297)</b> |                             |
|                      | BTP equation, AS | All    | 2380                      | 0.44 (-0.12, 1.11)          | 0.283 (0.273, 0.292)        |
|                      |                  | Female | 953                       | 0.51 (-0.38, 1.65)          | <b>0.291 (0.275, 0.307)</b> |
| Male                 |                  | 1427   | <b>0.40 (-0.18, 1.31)</b> | 0.277 (0.264, 0.291)        |                             |
| Black                |                  | 1308   | 0.46 (-0.28, 1.54)        | 0.292 (0.280, 0.306)        |                             |
| Non-black            |                  | 1072   | 0.41 (-0.21, 1.29)        | 0.271 (0.257, 0.285)        |                             |
| Age<40               |                  | 307    | <b>0.31 (-0.88, 2.27)</b> | 0.280 (0.259, 0.302)        |                             |
| Age 40-65            |                  | 1603   | 0.29 (-0.25, 1.10)        | 0.289 (0.277, 0.302)        |                             |
| Age>65               |                  | 470    | 0.91 (-0.44, 2.44)        | <b>0.262 (0.242, 0.286)</b> |                             |
| B2M equation, No ASR |                  | All    | 2380                      | -0.18 (-0.60, 0.28)         | 0.253 (0.239, 0.269)        |
|                      |                  | Female | 953                       | -0.91 (-1.69, -0.12)        | 0.269 (0.248, 0.296)        |
|                      | Male             | 1427   | 0.22 (-0.30, 0.81)        | 0.242 (0.225, 0.261)        |                             |
|                      | Black            | 1308   | 0.97 (0.10, 1.67)         | 0.258 (0.237, 0.284)        |                             |

|                   |           |      |                      |                      |
|-------------------|-----------|------|----------------------|----------------------|
|                   | Non-black | 1072 | -1.18 (-1.74, -0.60) | 0.246 (0.232, 0.262) |
|                   | Age<40    | 307  | 0.28 (-0.68, 1.55)   | 0.234 (0.215, 0.252) |
|                   | Age 40-65 | 1603 | 0.21 (-0.43, 0.77)   | 0.262 (0.243, 0.283) |
|                   | Age>65    | 470  | -1.65 (-2.29, -0.44) | 0.234 (0.210, 0.261) |
| B2M equation, ASR | All       | 2380 | -0.12 (-0.57, 0.40)  | 0.250 (0.237, 0.266) |
|                   | Female    | 953  | 0.23 (-0.57, 0.80)   | 0.265 (0.243, 0.291) |
|                   | Male      | 1427 | -0.35 (-0.82, 0.31)  | 0.241 (0.225, 0.260) |
|                   | Black     | 1308 | -0.14 (-0.91, 0.64)  | 0.256 (0.235, 0.281) |
|                   | Non-black | 1072 | -0.12 (-0.70, 0.49)  | 0.244 (0.230, 0.259) |
|                   | Age<40    | 307  | -0.57 (-1.88, 0.57)  | 0.236 (0.217, 0.255) |
|                   | Age 40-65 | 1603 | 0.22 (-0.36, 0.73)   | 0.259 (0.240, 0.280) |
|                   | Age>65    | 470  | -0.92 (-1.54, 0.23)  | 0.233 (0.210, 0.259) |
| BTP+B2M equation, | All       | 2380 | 0.19 (-0.30, 0.64)   | 0.237 (0.226, 0.248) |
| No ASR            | Female    | 953  | -1.45 (-1.96, -0.70) | 0.251 (0.233, 0.270) |
|                   | Male      | 1427 | 1.11 (0.66, 1.58)    | 0.227 (0.213, 0.242) |
|                   | Black     | 1308 | 0.52 (-0.19, 1.04)   | 0.240 (0.225, 0.257) |
|                   | Non-black | 1072 | -0.16 (-0.74, 0.58)  | 0.232 (0.218, 0.248) |
|                   | Age<40    | 307  | 1.10 (0.38, 2.79)    | 0.216 (0.198, 0.233) |
|                   | Age 40-65 | 1603 | 0.46 (-0.13, 0.84)   | 0.244 (0.230, 0.258) |
|                   | Age>65    | 470  | -1.45 (-2.03, -0.58) | 0.226 (0.203, 0.254) |
| BTP+B2M equation, | All       | 2380 | 0.27 (-0.16, 0.64)   | 0.234 (0.223, 0.245) |
| ASR               | Female    | 953  | 0.40 (-0.31, 0.95)   | 0.246 (0.229, 0.265) |
|                   | Male      | 1427 | 0.18 (-0.33, 0.73)   | 0.225 (0.212, 0.240) |

---

|           |      |                     |                      |
|-----------|------|---------------------|----------------------|
| Black     | 1308 | 0.41 (-0.30, 0.94)  | 0.239 (0.223, 0.256) |
| Non-black | 1072 | 0.17 (-0.35, 0.63)  | 0.228 (0.215, 0.243) |
| Age<40    | 307  | -0.21 (-1.34, 1.10) | 0.216 (0.198, 0.233) |
| Age 40-65 | 1603 | 0.40 (-0.12, 0.87)  | 0.241 (0.227, 0.255) |
| Age>65    | 470  | 0.11 (-0.89, 1.03)  | 0.222 (0.200, 0.249) |

---

**Bold** indicates differences comparing complex to simpler models that meet our criteria for improved performance (lower absolute bias by greater than 2 ml/min per 1.73 m<sup>2</sup> and reduced root mean square error (RMSE) greater than 3% in either the total population or in the subgroups)
